# Supplementary material for: Before or after Planting? Mycorrhizal and Bacterial Biostimulants and Extracts in Intense Strawberry (Fragaria × ananassa Duch.) Production
Source: MDPI journal article supplement (doi:10.3390/horticulturae9070769), 2023-07-05
Supplement: s1 [file s1]

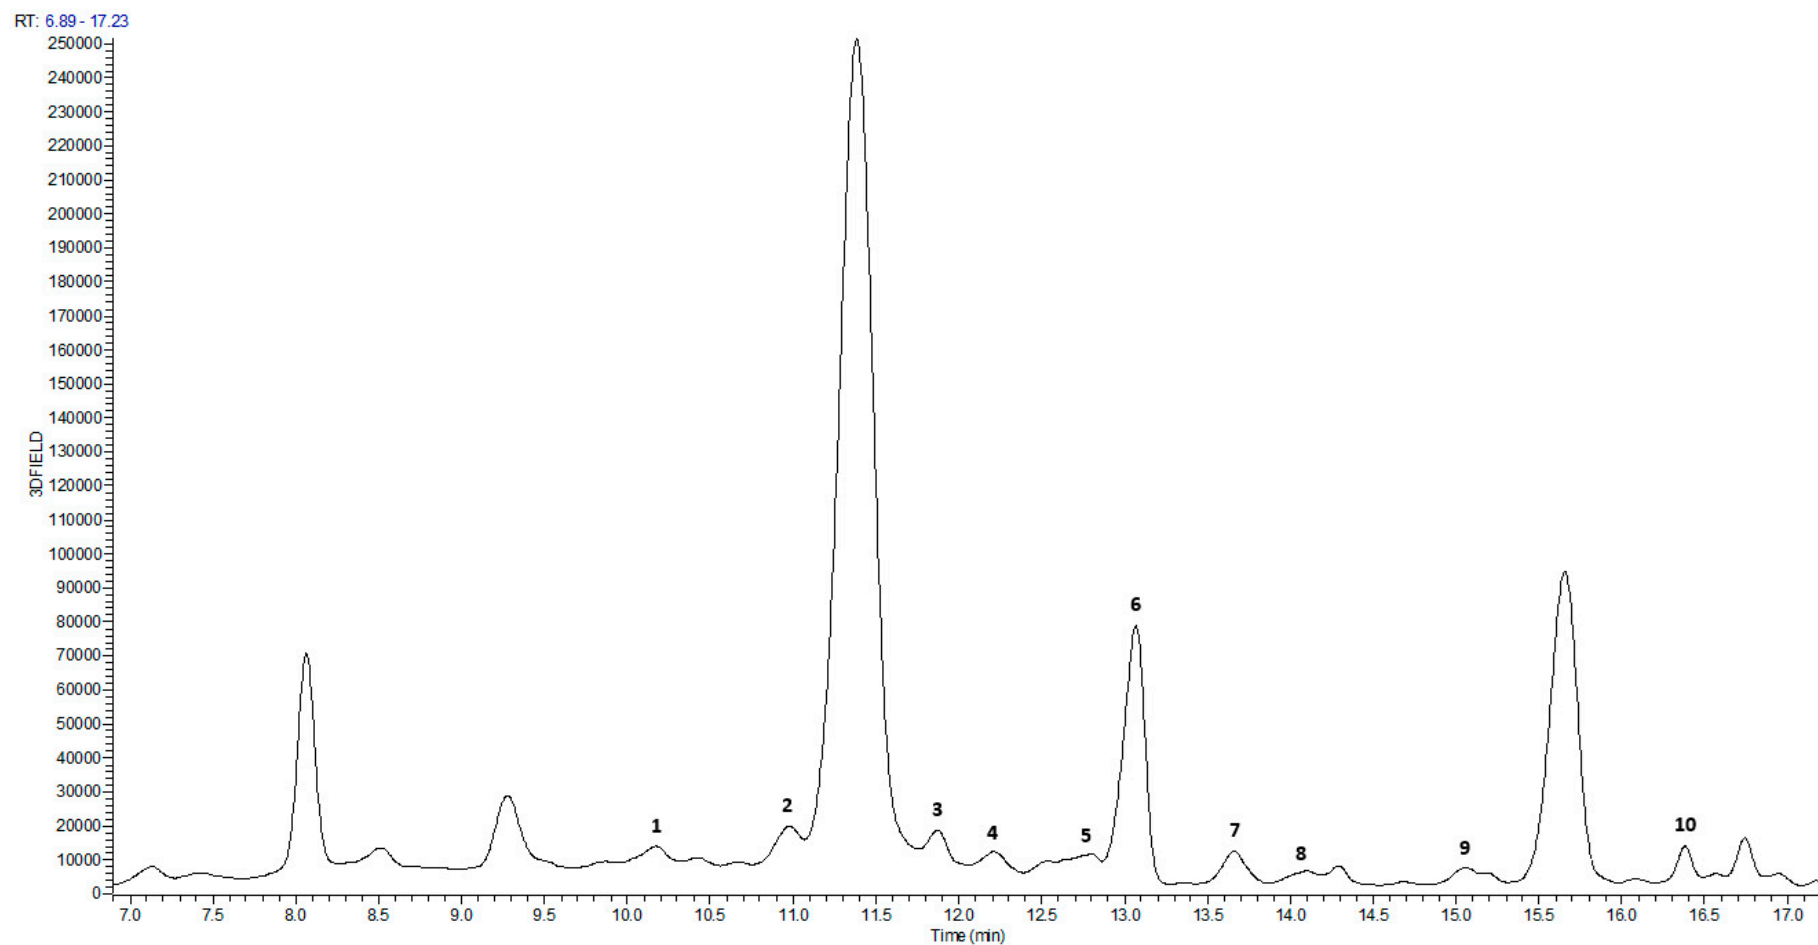

Supplementary material Figure S1: HPLC-MS (280 nm) chromatogram of individual phenolic compounds.

1, glucocaffeic acid; 2, procyanidin dimer; 3, procyanidin dimer; 4, procyanidin dimer; 5, procyanidin trimer; 6, catechin; 7, *p*-coumaric hexoside; 8, apigenin rhamnoside; 9, epicatechin; 10, procyanidin dimer.

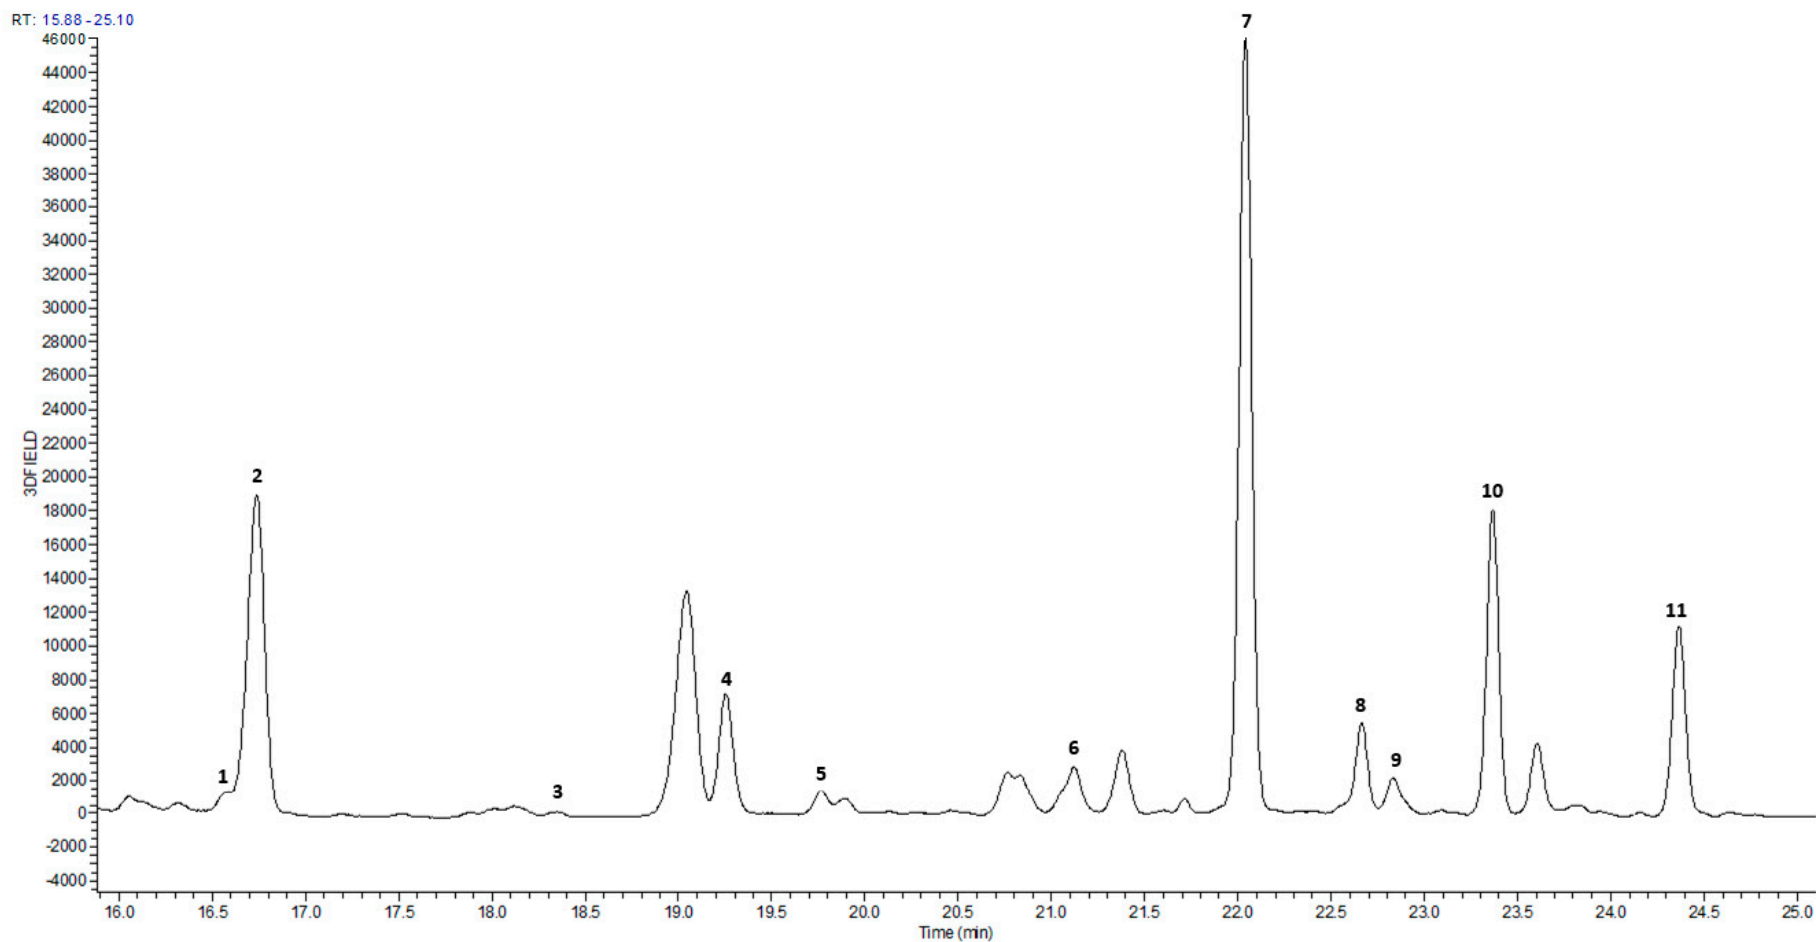

Supplementary material Figure S2: HPLC-MS (350 nm) chromatogram of individual phenolic compounds.

1, caffeic acid derivative; 2, ferulic acid hexoside derivative; 3, *p*-coumaric hexoside, ellagic acid derivative; 4, ellagic acid deoxyhexoside; 5, ellagic acid deoxyhexoside; 6, cinnamic acid-3-*O*-hexoside; 7, quercetin-3-*O*-glucuronide; 8, quercetin-3-*O*-hexoside, kaempferol-3-*O*-rutinoside; 9, kaempferol-3-*O*-hexoside; 10, kaempferol-3-*O*- $\beta$ -glucuronide; 11, kaempferol-malonylglucoside.

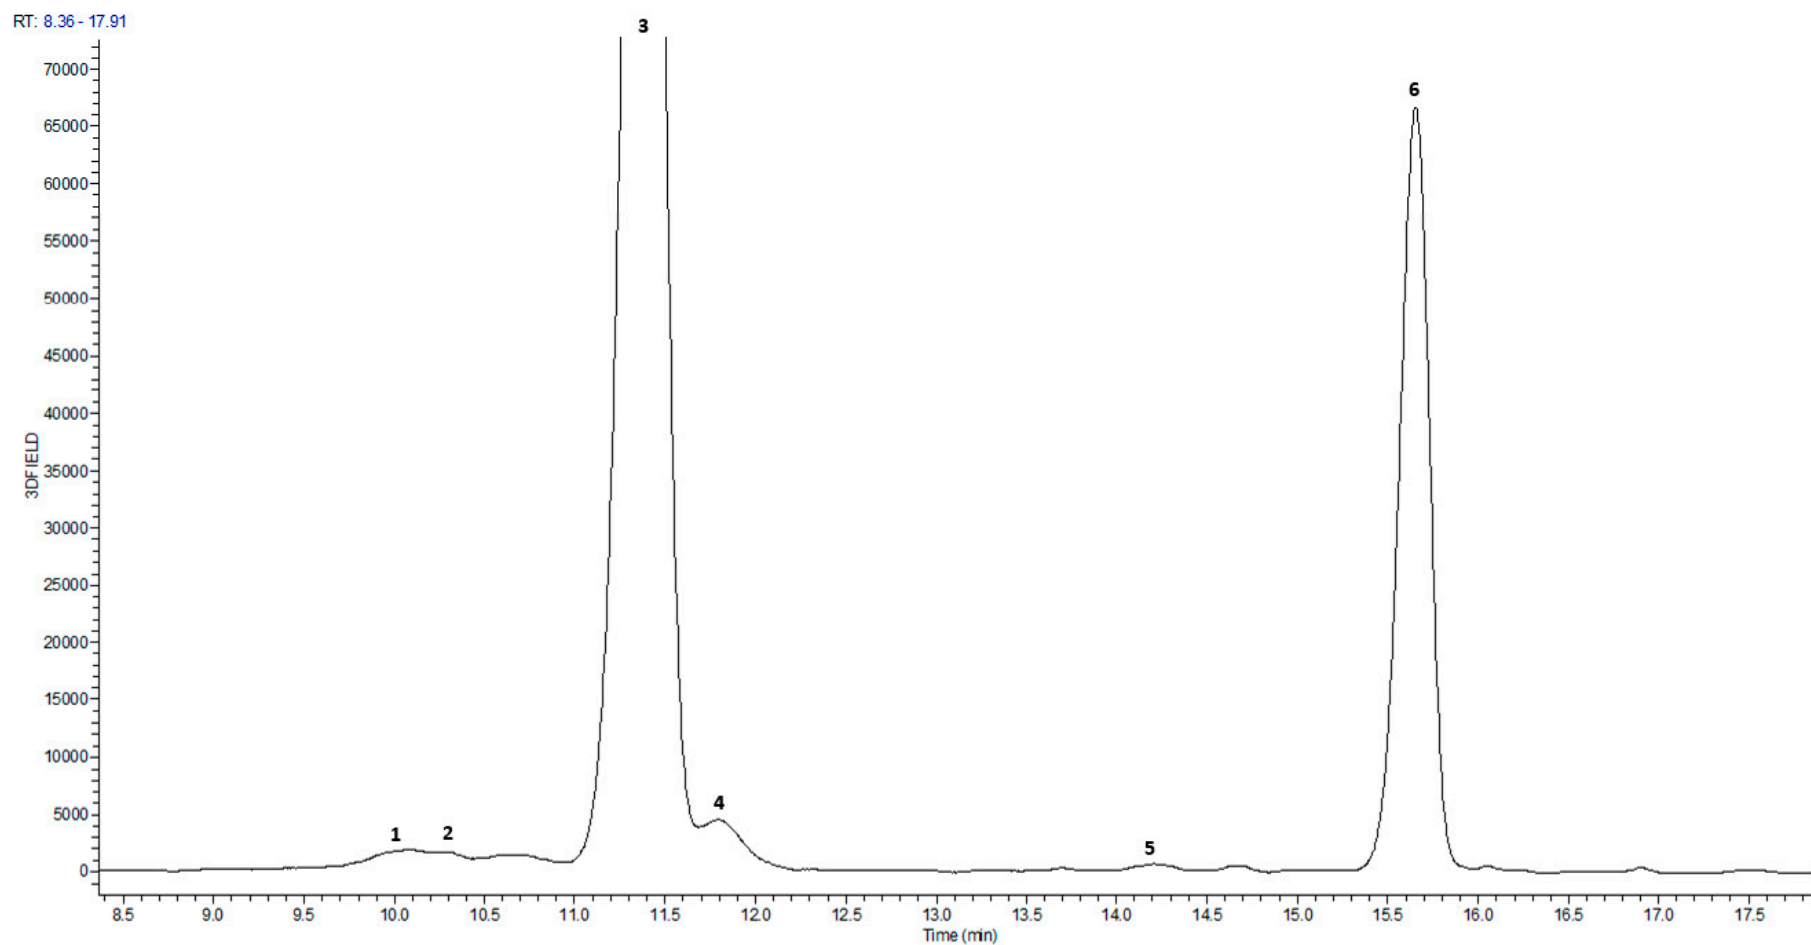

Supplementary material Figure S3: HPLC-MS (530 nm) chromatogram of individual phenolic compounds.

1, cyanidin-3-*O*-glucoside; 2, pelargonidin-3-*O*-glucoside; 3, pelargonidin-3-*O*-glucoside; 4, pelargonidin-3-*O*-glucoside; 5, pelargonidin-3-*O*-glucoside, cyanidin-3-*O*-glucoside; 6, pelargonidin-3-*O*-glucoside.

Supplementary material Table S1: Specifics of biostimulant applications in 2020 and 2021 on 'Clery' strawberries (CON control; BP before planting; AP after plating).

| Date                              | CON        | BP                                                                                                                                                                                                                                                                                                                                                                                                                                                                                                                                                                                                                                                | AP                                                                                                                                                                                                                                                                            |
|-----------------------------------|------------|---------------------------------------------------------------------------------------------------------------------------------------------------------------------------------------------------------------------------------------------------------------------------------------------------------------------------------------------------------------------------------------------------------------------------------------------------------------------------------------------------------------------------------------------------------------------------------------------------------------------------------------------------|-------------------------------------------------------------------------------------------------------------------------------------------------------------------------------------------------------------------------------------------------------------------------------|
| June 20 <sup>th</sup><br>2020     | water only | <i>2% Zn and Hydrogen peroxide</i><br>(Ken, L.G. ITALIA S.R.L.) 70 L/ha                                                                                                                                                                                                                                                                                                                                                                                                                                                                                                                                                                           | water only                                                                                                                                                                                                                                                                    |
| June 21 <sup>st</sup><br>2020     | water only | <i>humic and fulvic acids</i><br>(Start, L.G. ITALIA S.R.L.) 5 L/ha<br><i>yeast-based amino acids</i><br>(Carbogen L, L.G. ITALIA S.R.L.) 3 L/ha<br><i>Rhizoglopus irregulare, Glomus mosseae,</i><br><i>Funnelliformis caledonium 5% and Azotobacter vinelandii,</i><br><i>Bacillus megaterium, Rhodopseudomonas palustris</i><br><i>3 x 10<sup>12</sup> per kg of product</i><br>(Sphera L, L.G. ITALIA S.R.L.) 3 L/ha<br><i>Glomus mosseae, Glomus intraradices 1% and Beauveria</i><br><i>bassiana, Beauveria brongniartii, Metarhizium anisopliae 3 x 10<sup>11</sup></i><br><i>per kg of product</i><br>(Klozer, L.G. ITALIA S.R.L.) 2 L/ha | water only                                                                                                                                                                                                                                                                    |
| July 4 <sup>th</sup> 2020         | water only | water only                                                                                                                                                                                                                                                                                                                                                                                                                                                                                                                                                                                                                                        | <i>Rhizoglopus irregulare BEG72, Funnelliformis mossaea BEG234, Bacillus megaterium</i><br><i>MHBM77, Bacillus megaterium MHBM06, 1000 spores per g of product</i><br>(Team Horticola, Atens) 1.5 L/ha<br><i>Extracts of Mediterranean plants</i><br>(Heptabiol, Atens) 3L/ha |
| July 11 <sup>th</sup> 2020        | water only | water only                                                                                                                                                                                                                                                                                                                                                                                                                                                                                                                                                                                                                                        | <i>Trichoderma koningii TK7 1 x 10<sup>9</sup> per g of product, Bacillus megaterium 1 x 10<sup>7</sup> per g of product</i><br>(Condor Shield, Atens) 1 kg/ha<br><i>Extracts of Mediterranean plants</i><br>(Heptabiol, Atens) 3L/ha                                         |
| October 11 <sup>th</sup><br>2020  | water only | water only                                                                                                                                                                                                                                                                                                                                                                                                                                                                                                                                                                                                                                        | <i>Trichoderma koningii TK7 1 x 10<sup>9</sup> per g of product, Bacillus megaterium 1 x 10<sup>7</sup> per g of product</i><br>(Condor Shield, Atens) 1 kg/ha<br><i>Extracts of Mediterranean plants</i><br>(Heptabiol, Atens) 3L/ha                                         |
| February 23 <sup>rd</sup><br>2021 | water only | water only                                                                                                                                                                                                                                                                                                                                                                                                                                                                                                                                                                                                                                        | <i>Trichoderma koningii TK7 1 x 10<sup>9</sup> per g of product, Bacillus megaterium 1 x 10<sup>7</sup> per g of product</i><br>(Condor Shield, Atens) 1 kg/ha<br><i>Extracts of Mediterranean plants</i><br>(Heptabiol, Atens) 3L/ha                                         |

Supplementary material Table S2: Standards of phenolic compounds, used for identification and quantification of individual phenolic compounds, together with their retention times and analyses conditions.

| Standard of phenolic compound       | Retention time<br>(min) | Absorbance<br>(nm) | Ionization mode | Source voltage | Sheath gas | auxiliary gas | <i>m/z</i> scanning |
|-------------------------------------|-------------------------|--------------------|-----------------|----------------|------------|---------------|---------------------|
| Caffeic acid                        | 15.81                   | 280                | M-              | 4 kV           | 20 units   | 8 units       | 115 to 1600         |
| <i>p</i> -coumaric acid             | 20.53                   | 280                | M-              | 4 kV           | 20 units   | 8 units       | 115 to 1600         |
| Ferulic acid                        | 21.49                   | 280                | M-              | 4 kV           | 20 units   | 8 units       | 115 to 1600         |
| Ellagic acid                        | 21.79                   | 280                | M-              | 4 kV           | 20 units   | 8 units       | 115 to 1600         |
| Procyanidin-B1                      | 11.43                   | 280                | M-              | 4 kV           | 20 units   | 8 units       | 115 to 1600         |
| Catechin                            | 13.19                   | 280                | M-              | 4 kV           | 20 units   | 8 units       | 115 to 1600         |
| Epicatechin                         | 15.77                   | 280                | M-              | 4 kV           | 20 units   | 8 units       | 115 to 1600         |
| Luteolin-7- <i>O</i> -glucoside     | 23.65                   | 350                | M-              | 4 kV           | 20 units   | 8 units       | 115 to 1600         |
| Quercetin-3- <i>O</i> -glucoside    | 21.85                   | 350                | M-              | 4 kV           | 20 units   | 8 units       | 115 to 1600         |
| Kaempferol-3- <i>O</i> -glucoside   | 24.18                   | 350                | M-              | 4 kV           | 20 units   | 8 units       | 115 to 1600         |
| Cyanidin-3- <i>O</i> -glucoside     | 10.69                   | 530                | M <sup>+</sup>  | 4 kV           | 20 units   | 8 units       | 115 to 1600         |
| Pelargonidin-3- <i>O</i> -glucoside | 11.99                   | 530                | M <sup>+</sup>  | 4 kV           | 20 units   | 8 units       | 115 to 1600         |
